# Supplementary material for: Dermal macrophages control tactile perception under physiological conditions via NGF signaling
Source: PubMed Central journal article supplement — Sci Rep. 2024 Nov 8;14:27192. doi: 10.1038/s41598-024-78683-x (PMC11549316; doi:10.1038/s41598-024-78683-x), 2024-11-08

# Supplementary Figure 1

a

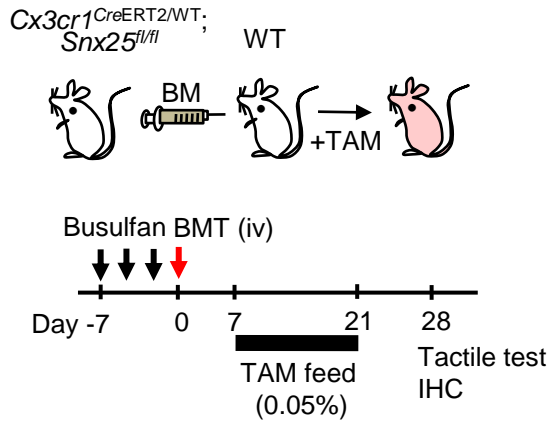

b

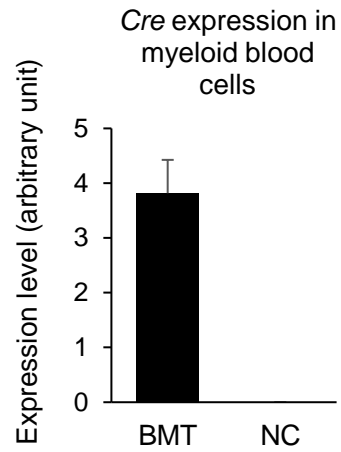

c

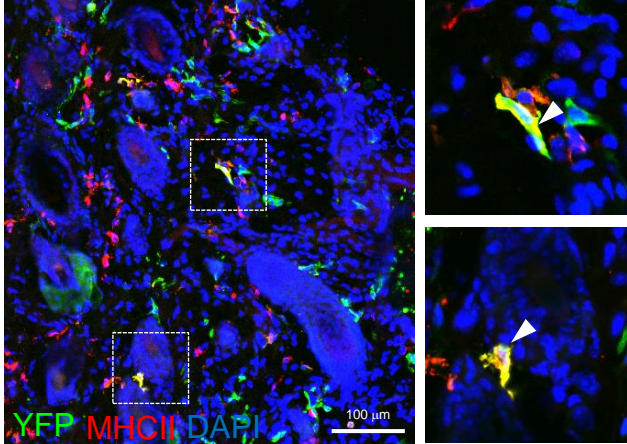

d

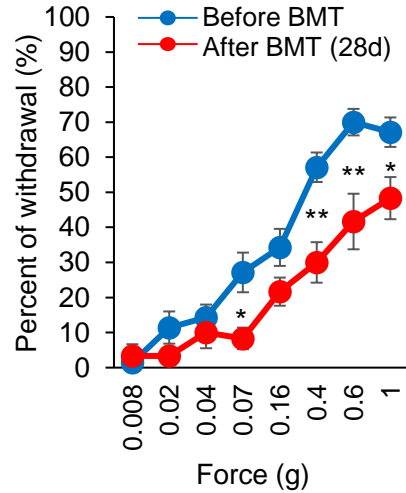

# Supplementary Figure 2

a

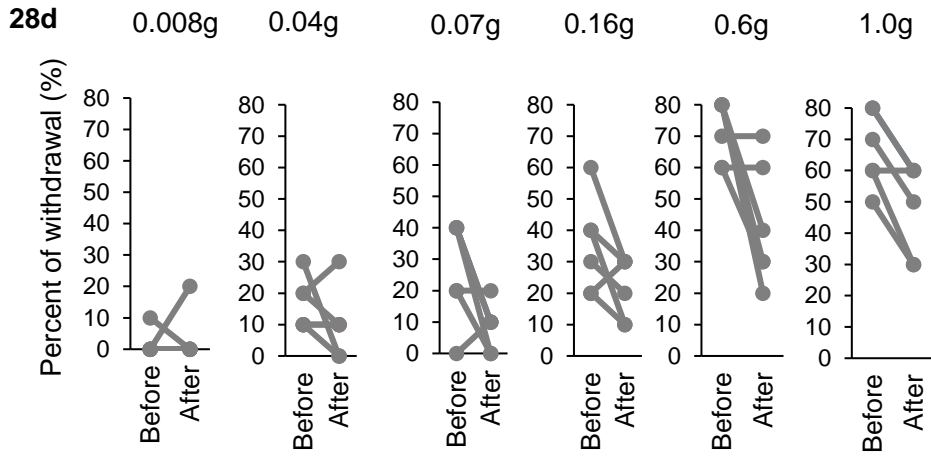

b

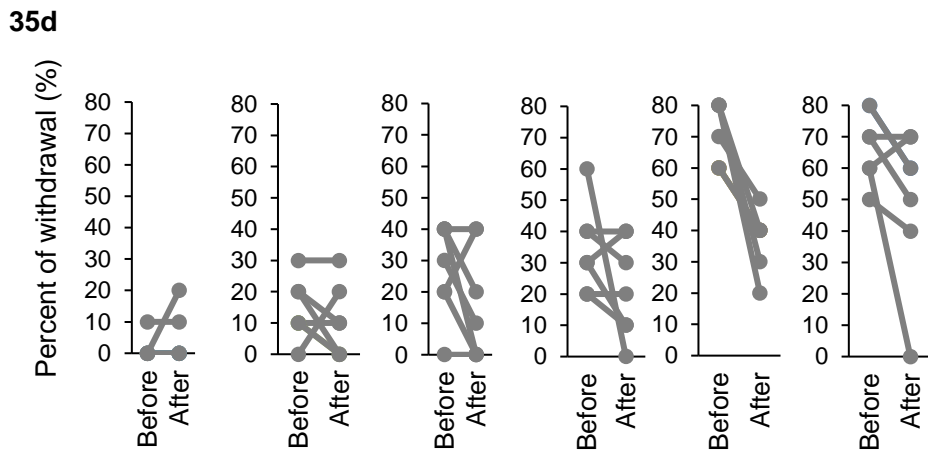

# Supplementary Figure 3

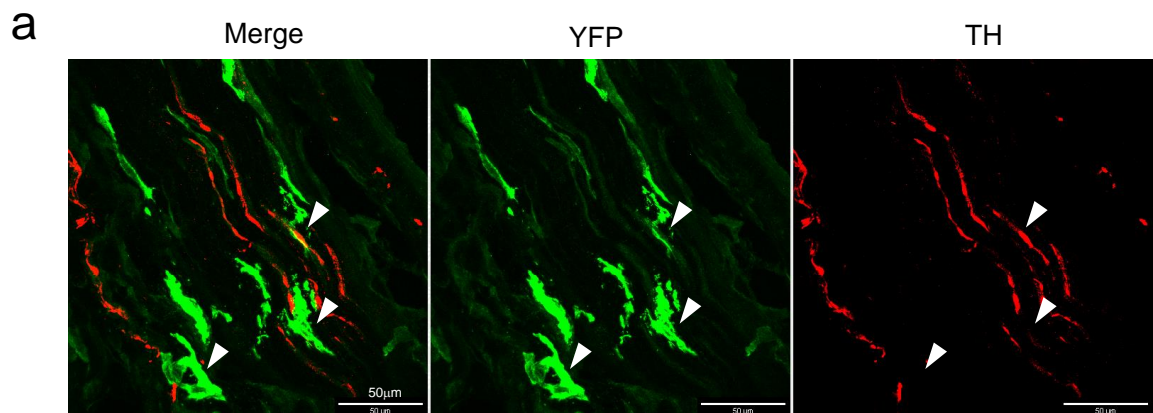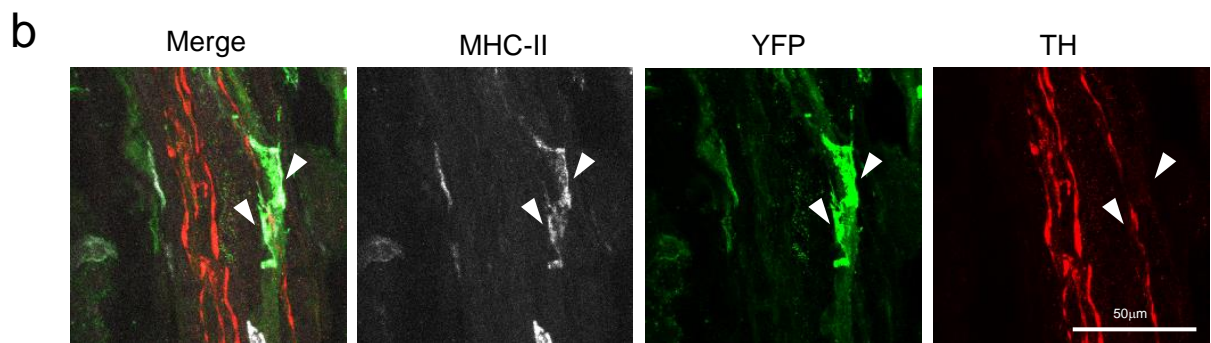

# Supplementary Figure 4

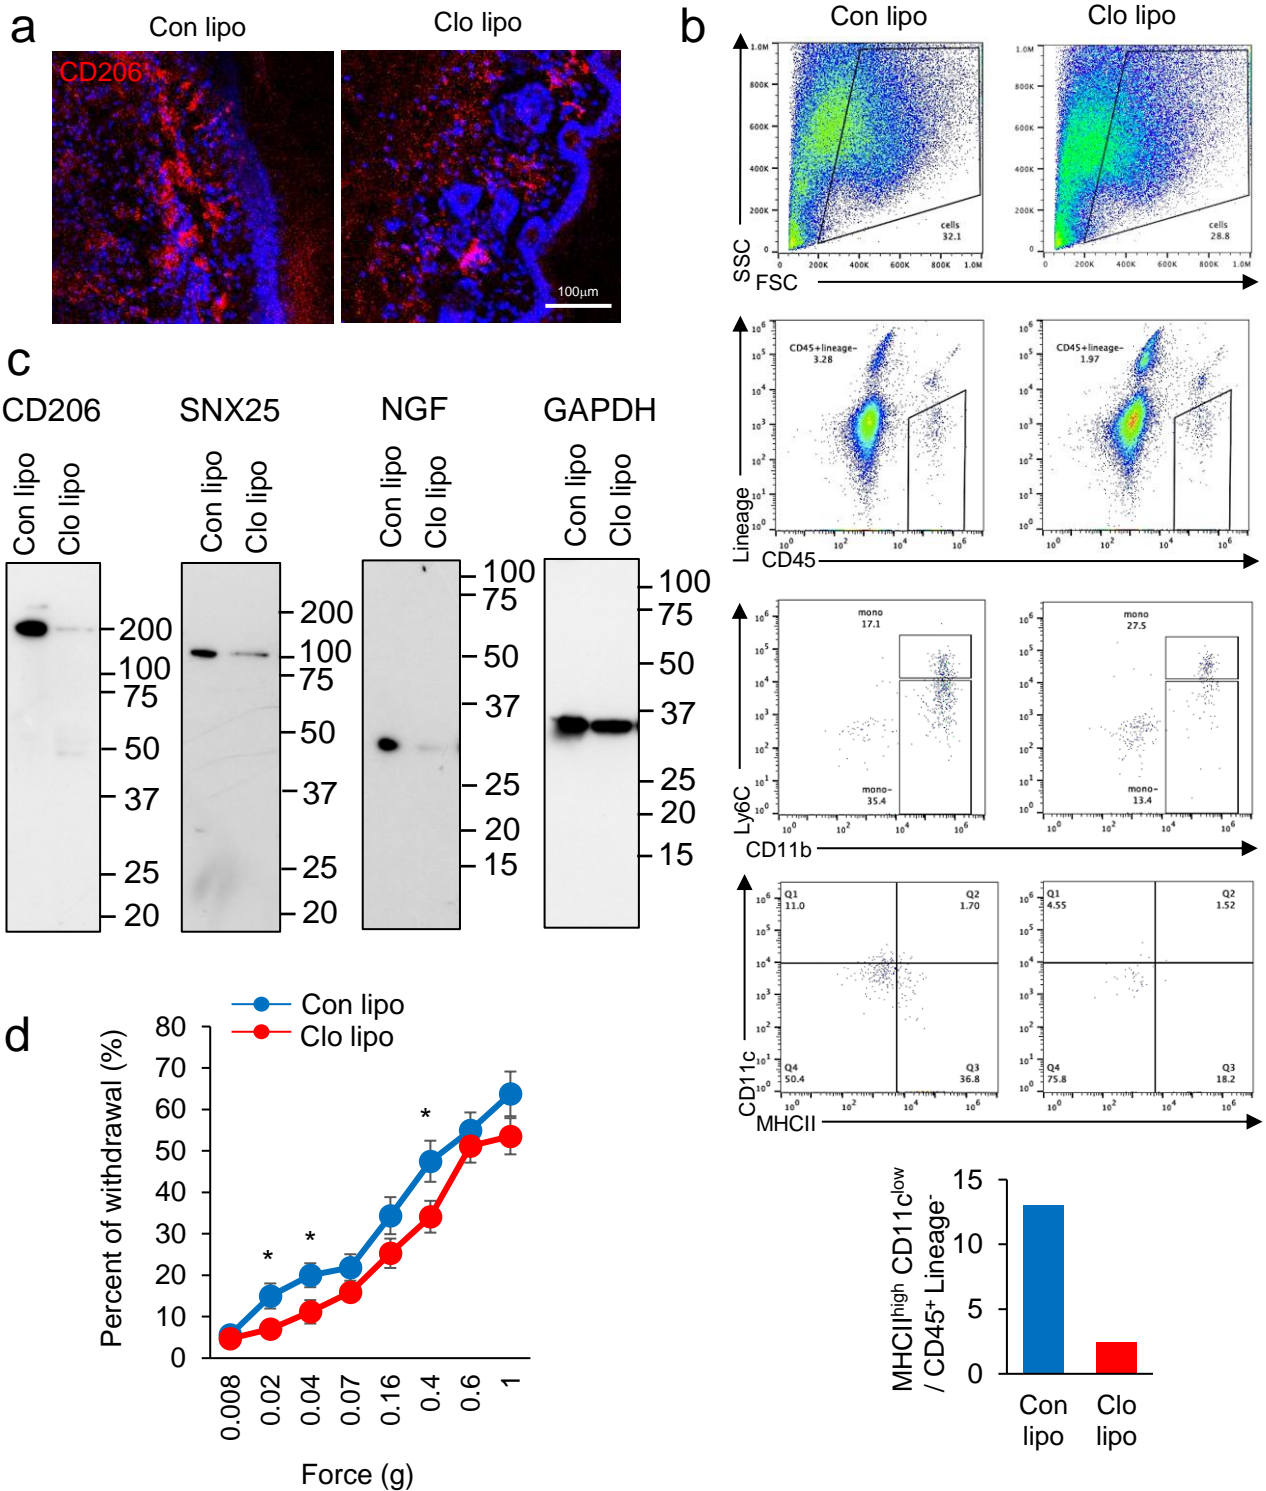

# Supplementary Figure 5

**a** 10h after NGF injection

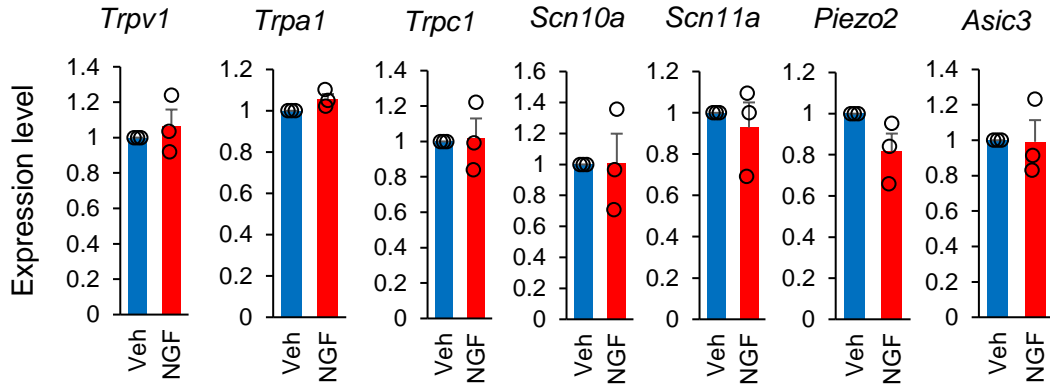

**b** 48h after NGF injection

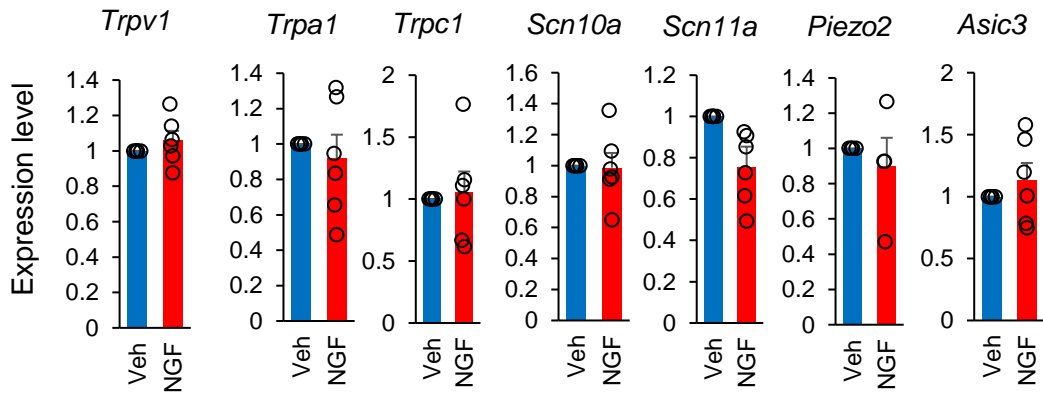

# Supplementary Figure 6

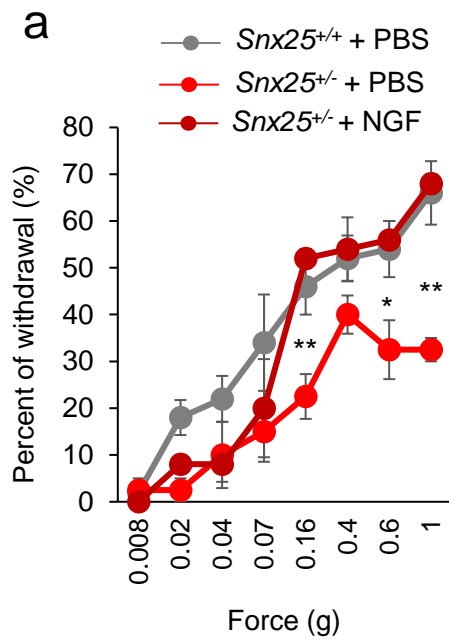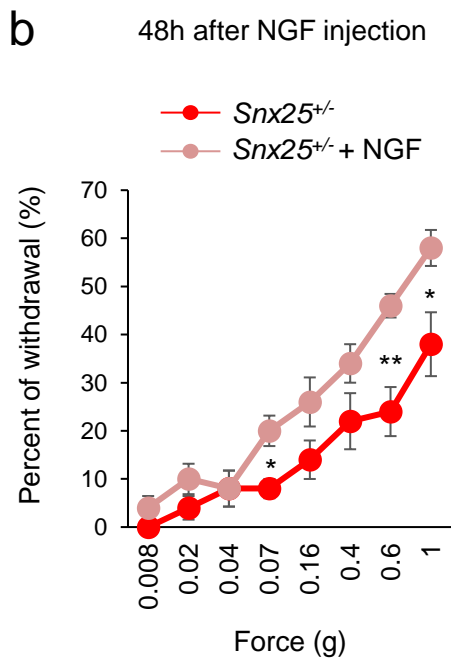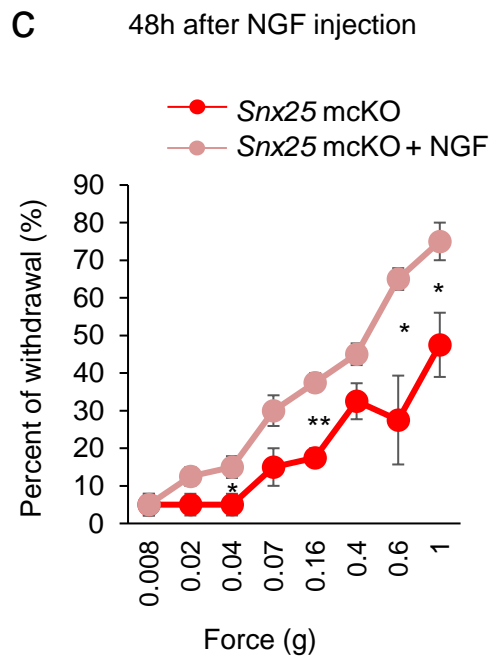

## Supplement Figure legends

### Supplementary Fig. 1

(a) Schedules for generation of BM chimeric mice by transplanting *Snx25* mcKO BM into WT mice, and subsequent tactile test. (b) mRNA expression levels for *Cre* in myeloid blood cells of recipient mice at xx d after BMT (n = 6, negative control (NC), n = 3). (c) Confocal microscopy of the hind paw skin immunolabeled for YFP and MHC-II in WT mice that received BMT from *Snx25* mcKO; Ai32<sup>Tg/+</sup> mice treated with TAM for 2 weeks. Boxed areas in the left panel are magnified in the right panels. Scale bar, 100  $\mu$ m. (d) Tactile test in chimeric mice (*Snx25* mcKO BM  $\rightarrow$  WT: n = 7, 28 days after BMT). 0.07g;  $p = 0.018$ , 0.4g;  $p = 0.003$ , 0.6g;  $p = 0.006$ , 1.0g;  $p = 0.024$ . The data are expressed as the mean  $\pm$  S.E.M. \* $p < 0.05$ , \*\* $p < 0.01$ . Statistical analyses were performed using the Student's *t*-test.

### Supplementary Fig. 2

(a) Changes of percent of withdrawal before and after BMT in each individual chimeric mice (*Snx25* mcKO BM  $\rightarrow$  WT, 28 days after BMT). (b) T Changes of percent of withdrawal before and after BMT in each individual chimeric mice (*Snx25* mcKO BM  $\rightarrow$  WT, 35 days after BMT).

### Supplementary Fig. 3

(a) Confocal images of hind paw skin (naïve) stained for YFP (green) and TH (red) in 4-OHT-treated *Cx3cr1*<sup>CreER</sup>; *Snx25*<sup>fl/fl</sup>; Ai32 mice. Arrowheads denote nerve-associated YFP<sup>+</sup> cells. (b) Confocal images of hind paw skin (naïve) stained for YFP (green), MHC-II (white), and TH (red) in 4-OHT-treated *Cx3cr1*<sup>CreER</sup>; *Snx25*<sup>fl/fl</sup>; Ai32 mice. Arrowheads

denote nerve-associated YFP<sup>+</sup> cells.

#### **Supplementary Fig. 4**

(a) Confocal images of hind paw skin immunolabeled for CD206 in WT mice injected with control liposomes (Con lipo) or clodronate liposomes (Clo lipo) into hind paws. (b) Flow cytometry strategy to sort dermal macrophages from the hind paw skin of three mice using CD45, Ly6C, CD11b, CD11c, MHC-II, and lineage (CD3, CD19, Nk1.1, TER119, Ly6G) marker expression. MHC-II<sup>high</sup> CD11c<sup>low</sup> cells; Con lipo, 13.02%; Clo lipo, 2.43%. (c) Expression levels of CD206, SNX25, NGF, and GAPDH in the hind paw skin of the Con lipo-injected and Clo lipo-injected mice were examined by Western blotting. (d) Fine tactile sensitivity was examined with von Frey filaments whose mechanical pressure ranged from 0.008 g to 1 g, in WT mice at 24 h after Con lipo injection (n = 16) and in WT mice at 24 h after Clo lipo injection (n = 17). 0.02g;  $p = 0.031$ , 0.04g;  $p = 0.036$ , 0.4g;  $p = 0.040$ .

#### **Supplementary Fig. 5**

(a) mRNA expression levels for mechanosensory factors in DRG of mice at 10 h after injection with NGF and PBS (Veh: n = 3; NGF: n = 3). (b) mRNA expression levels for mechanosensory factors in DRG of mice at 48 h after injection with NGF and PBS (Veh: n = 5; NGF: n = 5). Results are represented as mean  $\pm$  SEM. Statistical analyses were performed using the Welch's  $t$ -test.

#### **Supplementary Fig. 6**

(a) Fine tactile sensitivity was examined with von Frey filaments whose mechanical



pressure ranged from 0.008 g to 1 g, in *Snx25<sup>+/-</sup>* mice and in *Snx25<sup>+/-</sup>* mice at 24 h after NGF and PBS (Veh) injection (*Snx25<sup>+/+</sup>* +PBS: n = 5; *Snx25<sup>+/-</sup>* +PBS: n = 4; *Snx25<sup>+/-</sup>* +NGF: n = 5). 0.16g;  $p = 0.0005$ , 0.6g;  $p = 0.013$ , 1.0g;  $p = 9.82e-06$ . **(b)** Fine tactile sensitivity was examined with von Frey filaments whose mechanical pressure ranged from 0.008 g to 1 g, in *Snx25<sup>+/-</sup>* mice and in *Snx25<sup>+/-</sup>* mice at 48 h after NGF injection (n = 5). 0.07g;  $p = 0.012$ , 0.6g;  $p = 0.005$ , 1.0g;  $p = 0.030$ . **(c)** Fine tactile sensitivity was examined with von Frey filaments as above, in *Snx25* mcKO mice and in *Snx25* mcKO mice at 48 h after NGF injection (n = 4). 0.04g;  $p = 0.050$ , 0.16g;  $p = 0.001$ , 0.6g;  $p = 0.022$ , 1.0g;  $p = 0.032$ . \* $p < 0.05$ , \*\* $p < 0.01$ . Results are represented as mean  $\pm$  SEM. Statistical analyses were performed using the Student's *t*-test.

# Related Figure 5d

## NGF

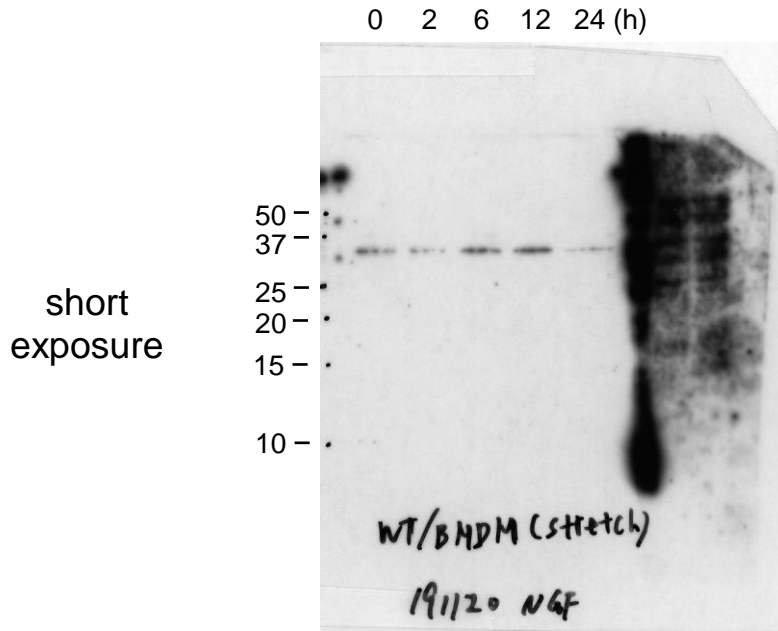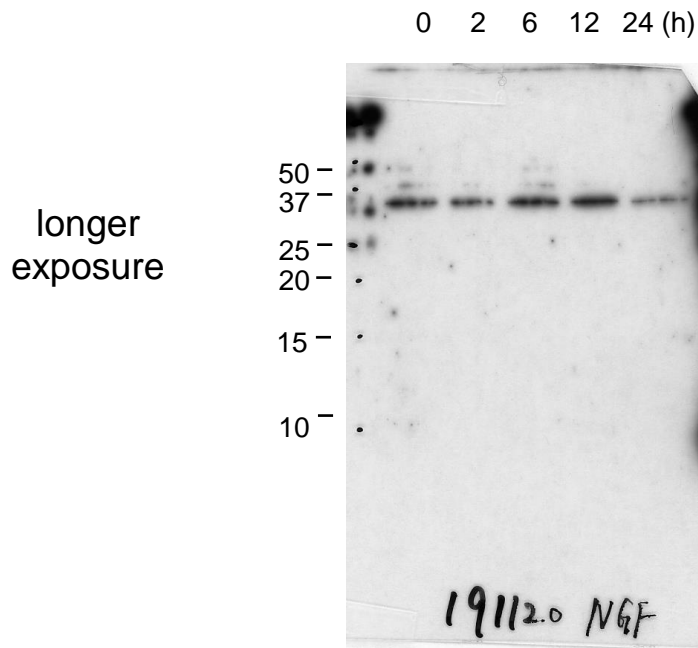

# Related Figure 5d

## GAPDH

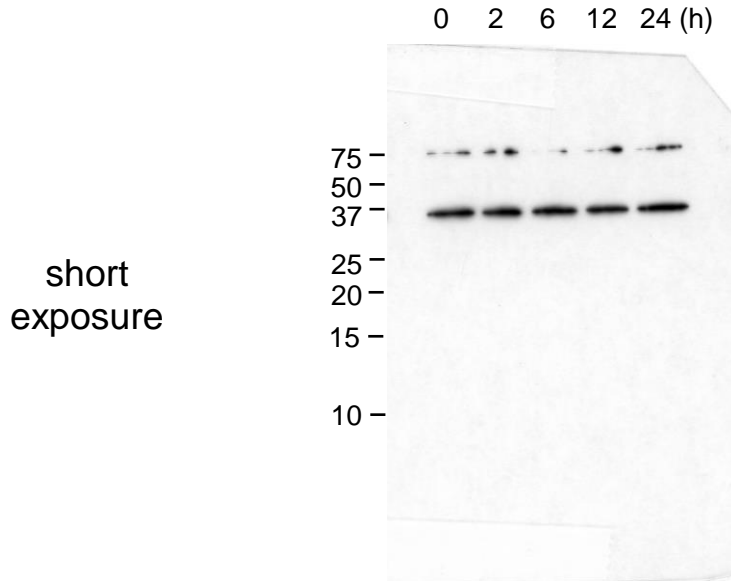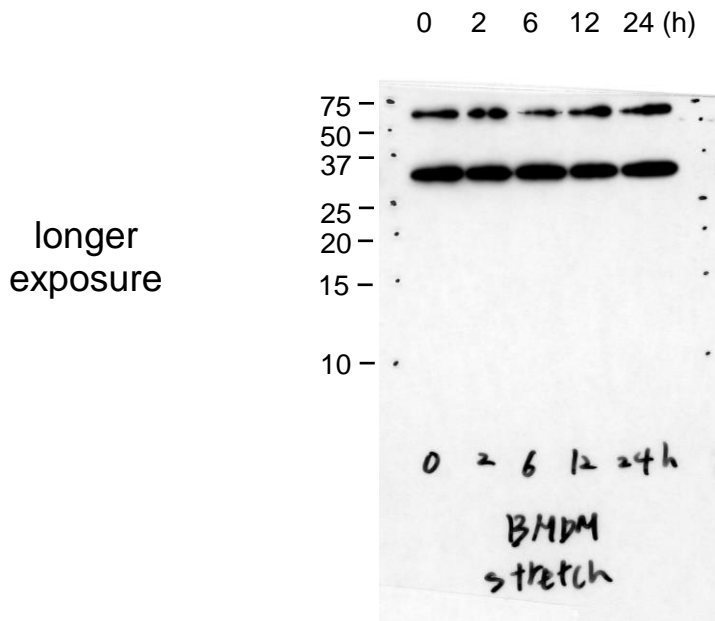

Related Supplementary Figure 4c

CD206

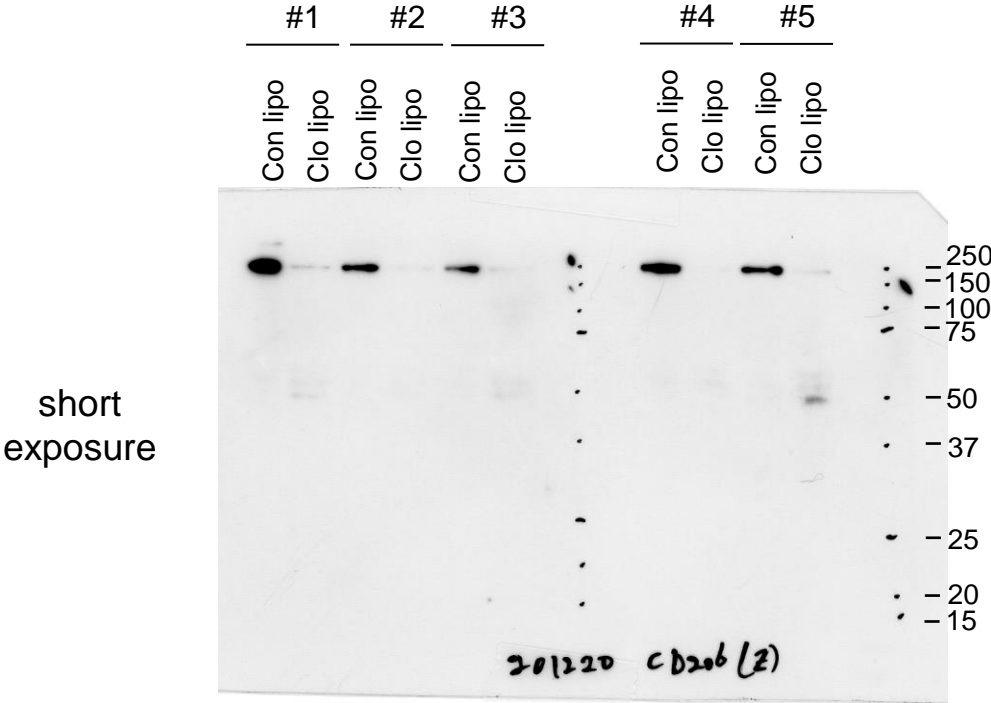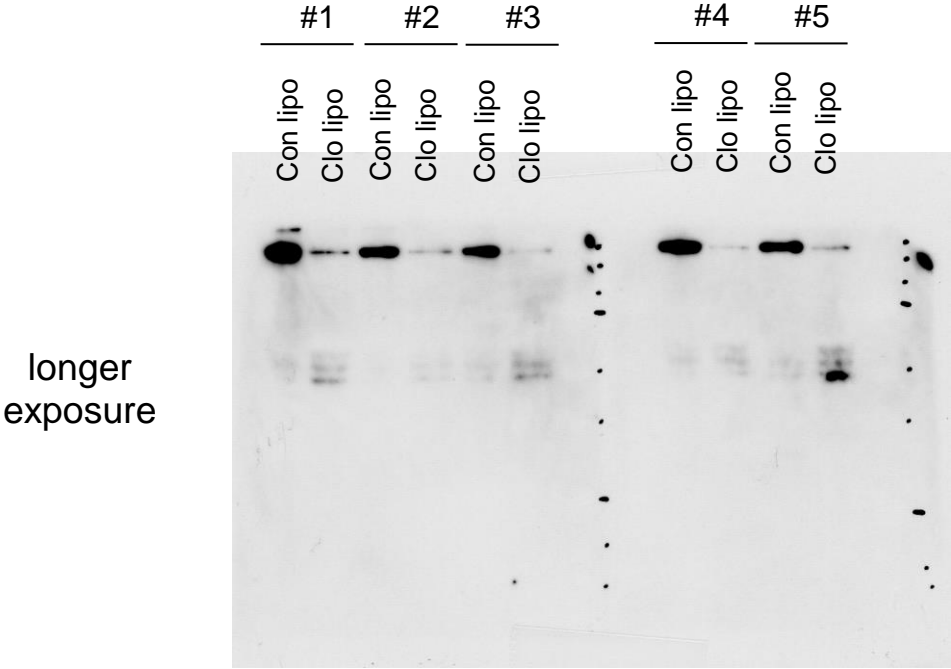

Related Supplementary Figure 4c

SNX25

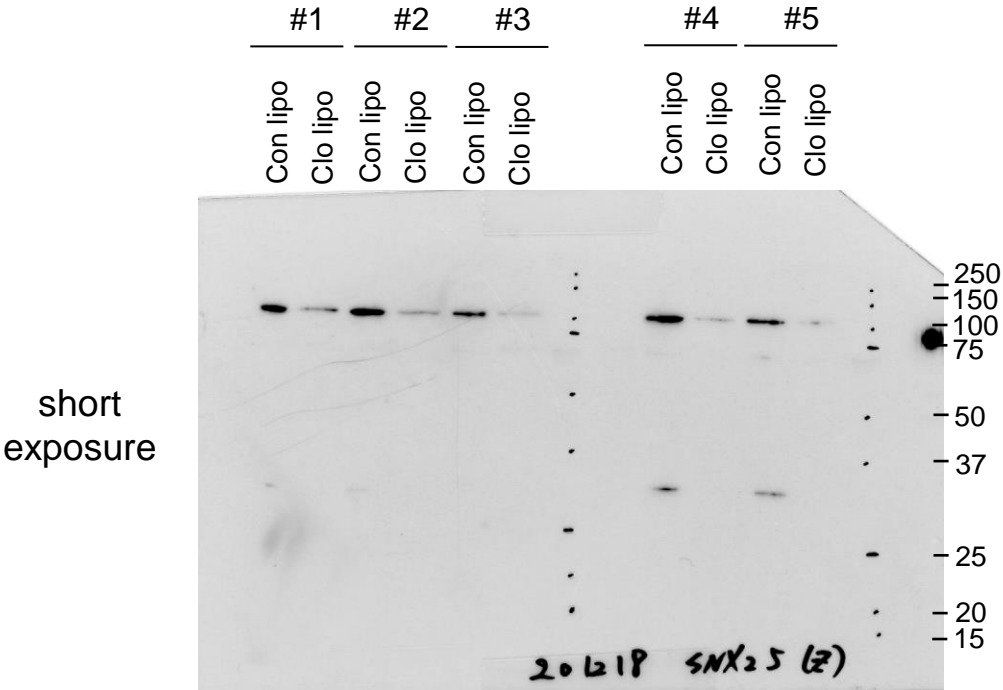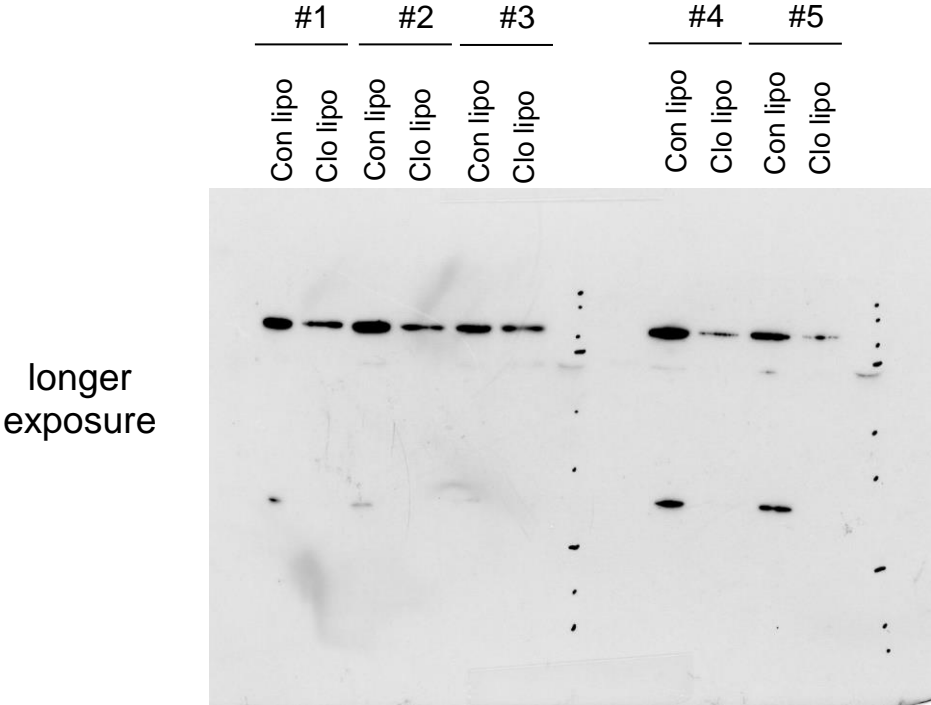

Related Supplementary Figure 4c

NGF

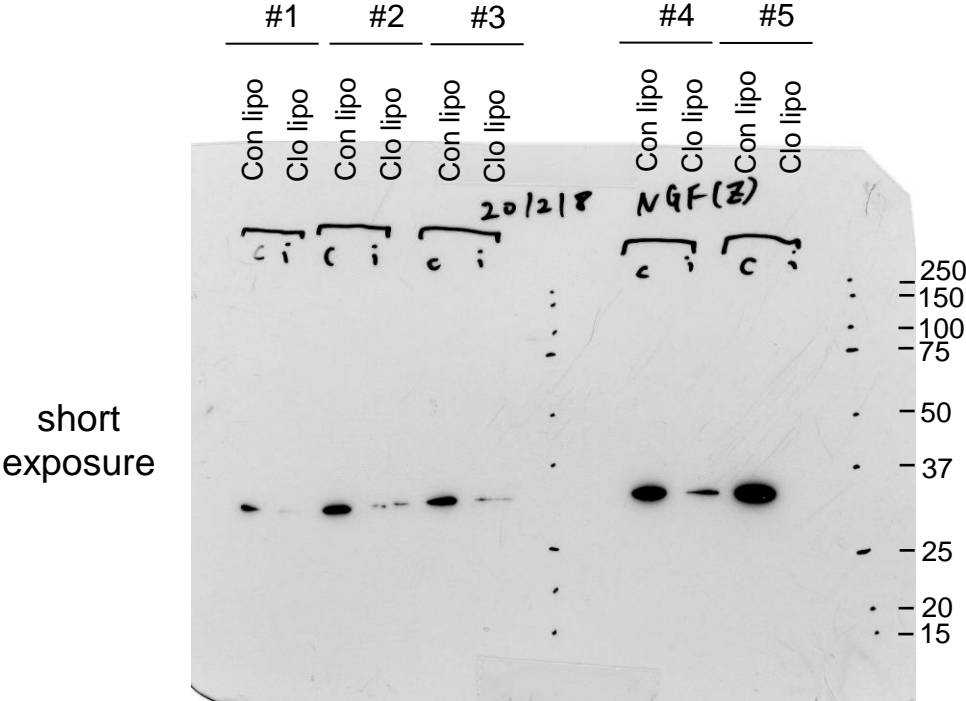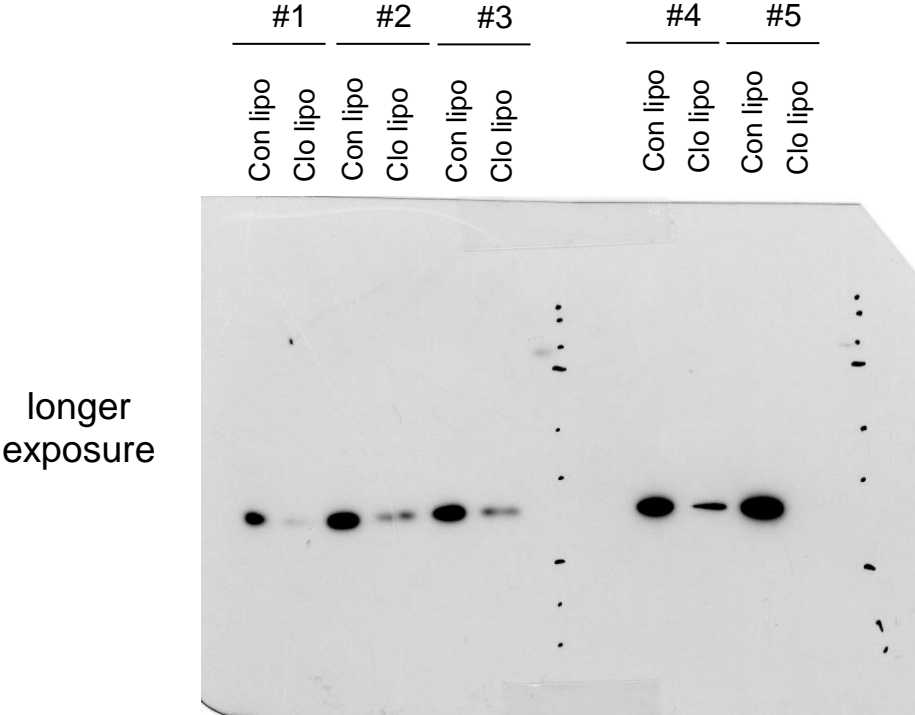

Related Supplementary Figure 4c

GAPDH

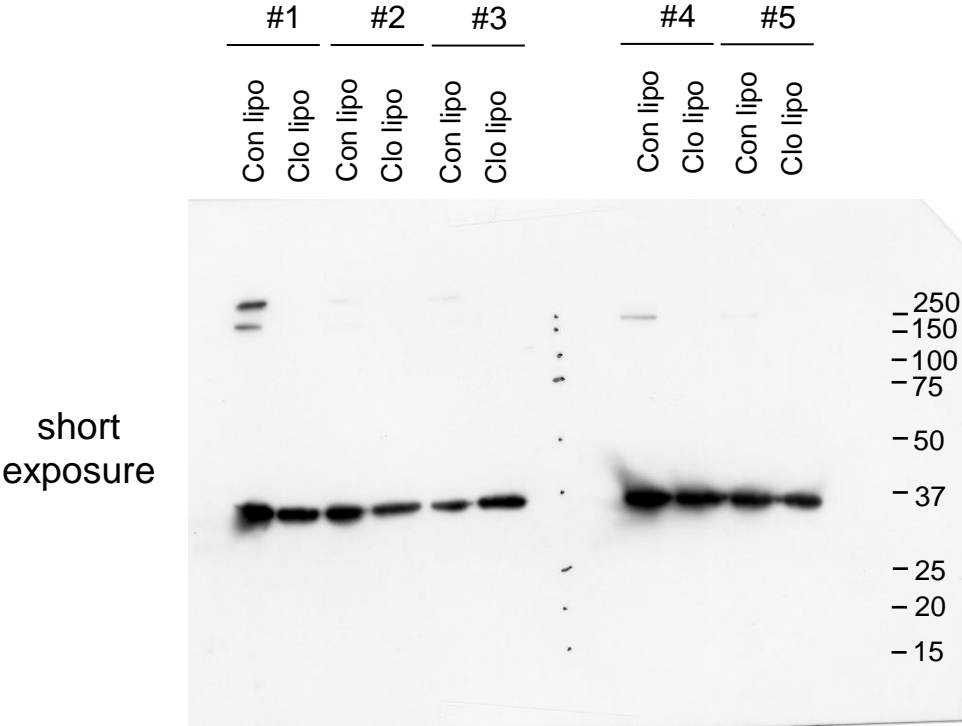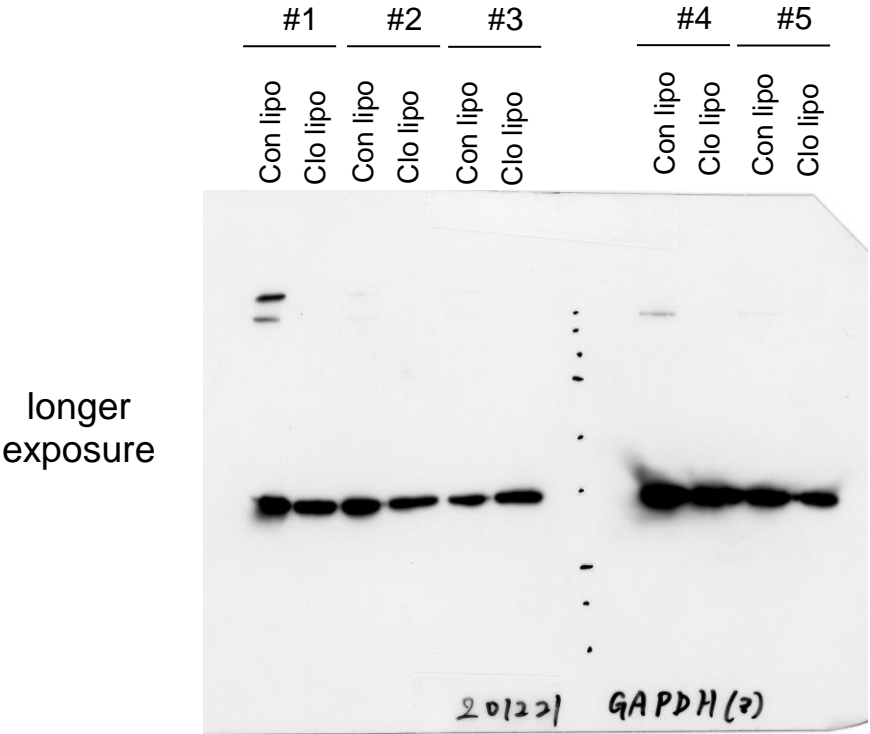

Supplement: 41598_2024_78683_MOESM1_ESM.pdf [file 41598_2024_78683_MOESM1_ESM.pdf]
